# Supplementary material for: Oxidation of the Platinum(II) Anticancer Agent [Pt{(p-BrC6F4)NCH2CH2NEt2}Cl(py)] to Platinum(IV) Complexes by Hydrogen Peroxide
Source: MDPI journal article supplement (doi:10.3390/molecules28176402), 2023-09-01
Supplement: s1 [file s1]

## Supporting information

### Oxidation of the platinum(II) anticancer agent [Pt{(p-BrC<sub>6</sub>F<sub>4</sub>)NCH<sub>2</sub>CH<sub>2</sub>NEt<sub>2</sub>}Cl(py)] to Platinum(IV) complexes by hydrogen peroxide

---

Ruchika Ojha<sup>1</sup>, Peter C. Junk<sup>2\*</sup>, Alan M. Bond<sup>1</sup>, Glen B. Deacon<sup>1</sup>

<sup>1</sup>School of Chemistry, Monash University, Clayton 3800 VIC, Australia, <sup>2</sup>College of Science, Technology & Engineering, James Cook University, Townsville, Qld, 4811, Australia.

**E-mail:** Alan Bond [alan.bond@monash.edu](mailto:alan.bond@monash.edu), Glen Deacon [glen.deacon@monash.edu](mailto:glen.deacon@monash.edu), Peter Junk [peter.junk@jcu.edu.au](mailto:peter.junk@jcu.edu.au)

## Table of contents:

### S1. Pt<sup>IV</sup> data

**Table S1** Selected bond angles for compounds **2·H<sub>2</sub>O<sub>(gold)</sub>** and **3·CH<sub>2</sub>Cl<sub>2</sub>**.

**Figure S1** Comparison of Powder XRD patterns calculated from single crystal X-ray diffraction data of **2·H<sub>2</sub>O<sub>(gold)</sub>** and **2·H<sub>2</sub>O<sub>(red)</sub>** presented in the respective colors.

**Table S2** Selected bond angles for compound **2·H<sub>2</sub>O<sub>(red)</sub>**.

### S2. [NBu<sub>4</sub>][PtCl<sub>3</sub>(py)] Data

**Figure S2** Molecular structure of [NBu<sub>4</sub>][PtCl<sub>3</sub>(py)], showing 50% thermal ellipsoids.

**Table S3** Crystallographic data for the molecular structures of [NBu<sub>4</sub>][PtCl<sub>3</sub>(py)].

**Table S4** Selected bond lengths and bond angles of [NBu<sub>4</sub>][PtCl<sub>3</sub>(py)].

### S3. Variable temperature NMR spectra

**Figure S3** <sup>19</sup>F NMR spectra obtained for **2·H<sub>2</sub>O<sub>(red)</sub>** over the temperature range of 25 °C to –60 °C.

**Figure S4** <sup>1</sup>H NMR spectra obtained for **2·H<sub>2</sub>O<sub>(red)</sub>** over temperature range of 25 °C to –60 °C, showing 6-9 ppm region.

**Figure S5** <sup>1</sup>H NMR spectra obtained for **2·H<sub>2</sub>O<sub>(red)</sub>** over the temperature range of 25 °C to –60 °C, showing 1 - 4.5 ppm region.

**Figure S6** <sup>19</sup>F NMR spectra obtained for **2·H<sub>2</sub>O<sub>(red)</sub>** at 25°C and 50°C.

### S4. PXRD data

**Figure S7** Normalized powder X-ray diffraction data for bulk samples of **2·H<sub>2</sub>O<sub>(gold)</sub>** and **2·H<sub>2</sub>O<sub>(red)</sub>**, shown in **their** respective colors.

**Figure S8** Normalized powder X-ray diffraction data for bulk sample of **2·H<sub>2</sub>O<sub>(red)</sub>** with normalized powder X-ray diffraction data generated from the single crystal of **1H** and **2·H<sub>2</sub>O<sub>(red)</sub>**.

**Figure S9** Normalized powder X-ray diffraction data for bulk sample of **2·H<sub>2</sub>O<sub>(gold)</sub>** with normalized powder X-ray diffraction data generated from the single crystals of **1H** and **2·H<sub>2</sub>O<sub>(gold)</sub>**.

### S5. Isolation of Pt<sup>IV</sup> from the solution of an aged bulk sample

**Table S5** Unit cell parameters for **1H** and co-crystallized **1(H/Cl)** collected from the bulk sample of **2·H<sub>2</sub>O<sub>(red)</sub>** and **2·H<sub>2</sub>O<sub>(gold)</sub>**.

**Table S6** Unit cell parameters for Pt<sup>IV</sup> **2·H<sub>2</sub>O<sub>(red)</sub>'**, co-crystallized **1(H/Cl)** and [NBu<sub>4</sub>][PtCl<sub>3</sub>(py)] isolated from the solution of an aged sample of **3·0.5CH<sub>2</sub>Cl<sub>2</sub>**.

### S6. Electrospray MS measurements

### S7. IR Spectroscopy data

## S1. Pt<sup>IV</sup> data

**Table S1** Selected bond angles for compounds **2·H<sub>2</sub>O<sub>(red)</sub>** and **3·0.5CH<sub>2</sub>Cl<sub>2</sub>**.

| <b>Bond angle</b>                                                   | <b>2·H<sub>2</sub>O<sub>(red)</sub></b><br><b>C<sub>17</sub>H<sub>23</sub>BrClF<sub>4</sub>N<sub>3</sub>O<sub>3</sub>Pt</b><br>(°) | <b>3·0.5CH<sub>2</sub>Cl<sub>2</sub></b><br><b>C<sub>17</sub>H<sub>22</sub>BrClF<sub>4</sub>N<sub>3</sub>O<sub>2</sub>Pt</b><br>(°) |
|---------------------------------------------------------------------|------------------------------------------------------------------------------------------------------------------------------------|-------------------------------------------------------------------------------------------------------------------------------------|
| <b>O1-Pt-O2</b>                                                     | 177.7(3)                                                                                                                           | 176.57(13)                                                                                                                          |
| <b>O1-Pt-N1<sub>(amide)</sub></b>                                   | 92.6(3)                                                                                                                            | 90.96(13)                                                                                                                           |
| <b>O2-Pt-N1<sub>(amide)</sub></b>                                   | 85.3(4)                                                                                                                            | 86.01(13)                                                                                                                           |
| <b>O1-Pt-N2<sub>(amine)</sub></b>                                   | 91.4(3)                                                                                                                            | 93.11(13)                                                                                                                           |
| <b>O2-Pt-N2<sub>(amine)</sub></b>                                   | 89.1(3)                                                                                                                            | 88.16(14)                                                                                                                           |
| <b>O1-Pt-N3<sub>(py)</sub></b>                                      | 88.0(3)                                                                                                                            | 89.24(13)                                                                                                                           |
| <b>O2-Pt-N3<sub>(py)</sub></b>                                      | 91.4(3)                                                                                                                            | 89.44(13)                                                                                                                           |
| <b>Cl-Pt-N1<sub>(amide)</sub></b>                                   | 176.4(3)                                                                                                                           | 178.33(10)                                                                                                                          |
| <b>N1<sub>(amide)</sub>-Pt-N2<sub>(amine)</sub></b>                 | 83.9(3)                                                                                                                            | 83.85(14)                                                                                                                           |
| <b>N1<sub>(amide)</sub>-Pt-N3<sub>(py)</sub></b>                    | 93.6(3)                                                                                                                            | 95.15(13)                                                                                                                           |
| <b>Pt-N1<sub>(amide)</sub>-C7<sub>(deen)</sub></b>                  | 108.8(7)                                                                                                                           | 108.1(2)                                                                                                                            |
| <b>C7<sub>(deen)</sub>-N1<sub>(amide)</sub>-C6<sub>(C6F4)</sub></b> | 117.4(8)                                                                                                                           | 117.9(3)                                                                                                                            |
| <b>Pt-N2<sub>(amine)</sub>-C8<sub>(deen)</sub></b>                  | 103.1(5)                                                                                                                           | 103.3(2)                                                                                                                            |

|                                                    |          |            |
|----------------------------------------------------|----------|------------|
| <b>Cl-Pt-N2<sub>(Et2)</sub></b>                    | 94.9(2)  | 95.88(10)  |
| <b>Cl-Pt-N3<sub>(py)</sub></b>                     | 87.6(3)  | 85.05(10)  |
| <b>N2<sub>(Et2)</sub>-Pt-N3<sub>(py)</sub></b>     | 177.4(3) | 177.45(13) |
| <b>Pt-N1<sub>(amide)</sub>-C6<sub>(C6F4)</sub></b> | 118.2(7) | 116.9(3)   |

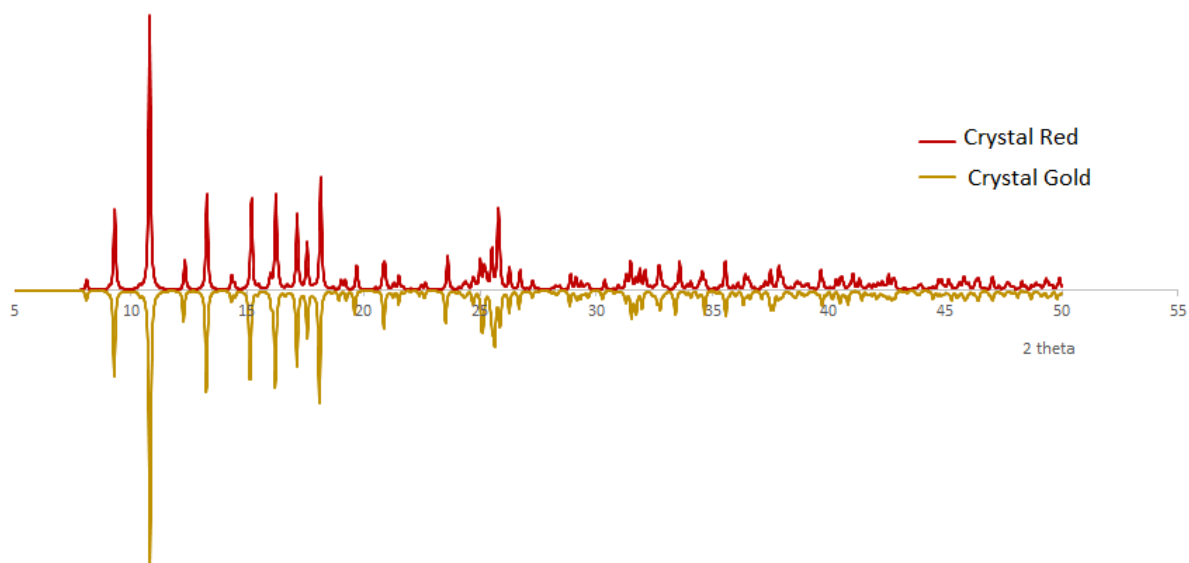

**Figure S1 Comparison of Powder XRD patterns calculated from single crystal X-ray diffraction data of  $2 \cdot \text{H}_2\text{O}_{(\text{gold})}$  and  $2 \cdot \text{H}_2\text{O}_{(\text{red})}$  presented in the respective colors.**

**Table S2 Selected bond angles for compound  $2 \cdot \text{H}_2\text{O}_{(\text{red})}$ .**

| Bond angle                                                          | $2 \cdot \text{H}_2\text{O}_{(\text{red})}$ (°)                                                                   |          |
|---------------------------------------------------------------------|-------------------------------------------------------------------------------------------------------------------|----------|
|                                                                     | $\text{C}_{17}\text{H}_{23}\text{BrClF}_4\text{N}_3\text{O}_3\text{Pt}$<br>(molecules A and B in asymmetric unit) |          |
| <b>O1-Pt-O2</b>                                                     | 177.9(3)                                                                                                          | 177.8(4) |
| <b>O1-Pt-N1<sub>(amide)</sub></b>                                   | 92.2(3)                                                                                                           | 91.9(4)  |
| <b>O2-Pt-N1<sub>(amide)</sub></b>                                   | 85.7(3)                                                                                                           | 86.0(4)  |
| <b>O1-Pt-N2<sub>(amine)</sub></b>                                   | 91.3(3)                                                                                                           | 90.8(3)  |
| <b>O2-Pt-N2<sub>(amine)</sub></b>                                   | 88.8(3)                                                                                                           | 89.5(3)  |
| <b>O1-Pt-N3<sub>(py)</sub></b>                                      | 91.9(3)                                                                                                           | 91.0(3)  |
| <b>O2-Pt-N3<sub>(py)</sub></b>                                      | 87.9(3)                                                                                                           | 88.5(3)  |
| <b>O1-Pt-Cl</b>                                                     | 90.8(2)                                                                                                           | 90.8(2)  |
| <b>O2-Pt-Cl</b>                                                     | 91.2(2)                                                                                                           | 91.3(2)  |
| <b>Cl-Pt-N1<sub>(amide)</sub></b>                                   | 176.5(3)                                                                                                          | 177.1(3) |
| <b>N1<sub>(amide)</sub>-Pt-N2<sub>(amine)</sub></b>                 | 84.0(4)                                                                                                           | 83.7(4)  |
| <b>N1<sub>(amide)</sub>-Pt-N3<sub>(py)</sub></b>                    | 93.1(4)                                                                                                           | 93.2(4)  |
| <b>Pt-N1<sub>(amide)</sub>-C7<sub>(deen)</sub></b>                  | 108.5(7)                                                                                                          | 108.6(7) |
| <b>C7<sub>(deen)</sub>-N1<sub>(amide)</sub>-C6<sub>(C6F4)</sub></b> | 117.9(9)                                                                                                          | 119.0(9) |

|                                                    |          |          |
|----------------------------------------------------|----------|----------|
| <b>Pt-N2<sub>(amine)</sub>-C8<sub>(deen)</sub></b> | 103.3(6) | 103.9(6) |
| <b>Cl-Pt-N2<sub>(Et2)</sub></b>                    | 95.1(3)  | 95.1(3)  |
| <b>Cl-Pt-N3<sub>(py)</sub></b>                     | 87.8(3)  | 88.0(3)  |
| <b>N2<sub>(Et2)</sub>-Pt-N3<sub>(py)</sub></b>     | 177.0(3) | 176.8(4) |
| <b>Pt-N1<sub>(amide)</sub>-C6<sub>(C6F4)</sub></b> | 119.0(7) | 118.4(7) |
| <b>N1-C7<sub>(deen)</sub>-C8<sub>(deen)</sub></b>  | 105.4(9) | 106.2(9) |

## S2. [NBu<sub>4</sub>][PtCl<sub>3</sub>(py)] Data

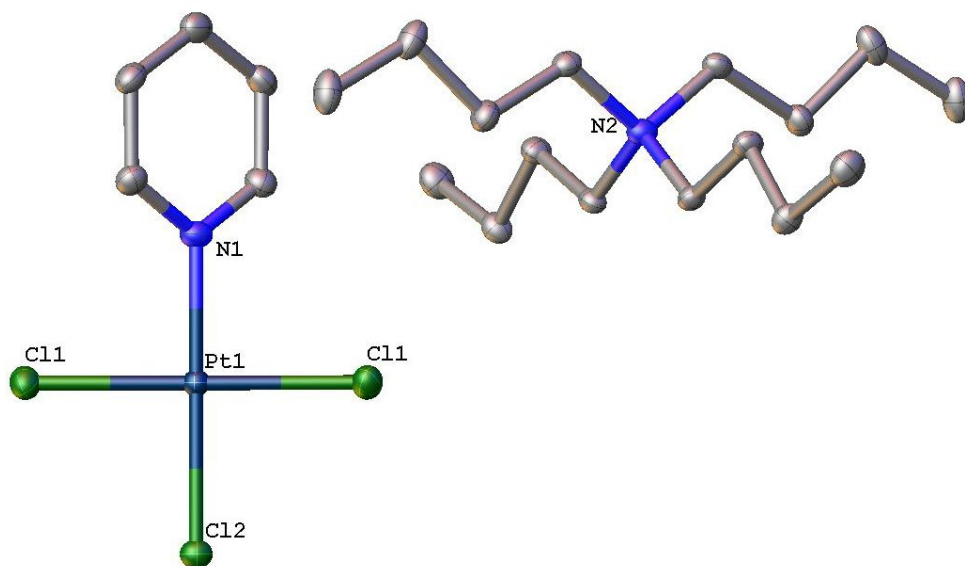

**Figure S2 Molecular structure of [NBu<sub>4</sub>][PtCl<sub>3</sub>(py)], showing 50% thermal ellipsoids. H atoms are removed for clarity.**

Similar structure to [NBu<sub>4</sub>][PtCl<sub>3</sub>(C<sub>5</sub>H<sub>5</sub>N)] are reported earlier such as [NEt<sub>4</sub>][PtCl<sub>3</sub>(C<sub>6</sub>H<sub>5</sub>N)] [S1] [K][PtCl<sub>3</sub>(C<sub>6</sub>H<sub>3</sub>(CH<sub>3</sub>)<sub>2</sub>N)] [S2], [C<sub>5</sub>H<sub>4</sub>(C<sub>2</sub>H<sub>5</sub>)NH][PtCl<sub>3</sub>(C<sub>6</sub>H<sub>4</sub>(C<sub>2</sub>H<sub>5</sub>)N)] [S3] etc. The bond lengths and angles of the anion [PtCl<sub>3</sub>(C<sub>6</sub>H<sub>5</sub>N)]<sup>−</sup> are similar in all of these compounds.

**Table S3 Crystallographic data for the molecular structures of [NBu<sub>4</sub>][PtCl<sub>3</sub>(py)].**

|                                                                        | [NBu <sub>4</sub> ][PtCl <sub>3</sub> (py)]                       |
|------------------------------------------------------------------------|-------------------------------------------------------------------|
| <b>empirical formula</b>                                               | C <sub>21</sub> H <sub>41</sub> Cl <sub>3</sub> N <sub>2</sub> Pt |
| <b>Formula weight</b>                                                  | 623.00                                                            |
| <b>Crystal system</b>                                                  | tetragonal                                                        |
| <b>Space group</b>                                                     | <i>P</i> 4 <sub>3</sub> 2 <sub>1</sub> 2                          |
| <b><i>a</i> (Å)</b>                                                    | 14.337(2)                                                         |
| <b><i>b</i> (Å)</b>                                                    | 14.337(2)                                                         |
| <b><i>c</i> (Å)</b>                                                    | 12.083(2)                                                         |
| <b><i>α</i> (°)</b>                                                    | 90                                                                |
| <b><i>β</i> (°)</b>                                                    | 90                                                                |
| <b><i>γ</i> (°)</b>                                                    | 90                                                                |
| <b>vol(Å<sup>3</sup>)</b>                                              | 2483.7(9)                                                         |
| <b><i>Z</i></b>                                                        | 4                                                                 |
| <b><i>ρ</i> (calcd) (g/cm<sup>3</sup>)</b>                             | 1.666                                                             |
| <b><i>μ</i> (mm<sup>-1</sup>)</b>                                      | 5.982                                                             |
| <b>F(000)</b>                                                          | 1240                                                              |
| <b>reflections collected/ unique</b>                                   | 45812/3812                                                        |
| <b><i>R</i><sub>int</sub></b>                                          | 0.0663                                                            |
| <b>2<math>\theta</math><sub>max</sub> (°)</b>                          | 63.5                                                              |
| <b>Goodness-of-fit on F<sup>2</sup></b>                                | 1.085                                                             |
| <b><i>R</i>1 indices [<i>I</i> ≥ 2<math>\sigma</math> (<i>I</i>)]</b>  | 0.0277                                                            |
| <b><i>wR</i>2 indices [<i>I</i> ≥ 2<math>\sigma</math> (<i>I</i>)]</b> | 0.0694                                                            |
| <b>Absolute structure parameter</b>                                    | 0.025(3) [S4]                                                     |

**Table S4 Selected bond lengths and bond angles of [NBu<sub>4</sub>][PtCl<sub>3</sub>(py)].**

| <b>Bond</b>    | <b>length (Å)</b> | <b>Bond</b>        | <b>Angle (°)</b> |
|----------------|-------------------|--------------------|------------------|
| <b>Pt-Cl1</b>  | 2.3174(12)        | <b>N1-Pt-Cl1</b>   | 89.91(3)         |
| <b>Pt-Cl1'</b> | 2.3174(12)        | <b>N1-Pt-Cl2</b>   | 180.000(12)      |
| <b>Pt-Cl2</b>  | 2.3078(15)        | <b>Cl1-Pt-Cl1'</b> | 179.81(7)        |
| <b>Pt-N1</b>   | 2.003(5)          | <b>N1-Pt-Cl1</b>   | 90.09(3)         |

### S3. Variable temperature NMR spectra

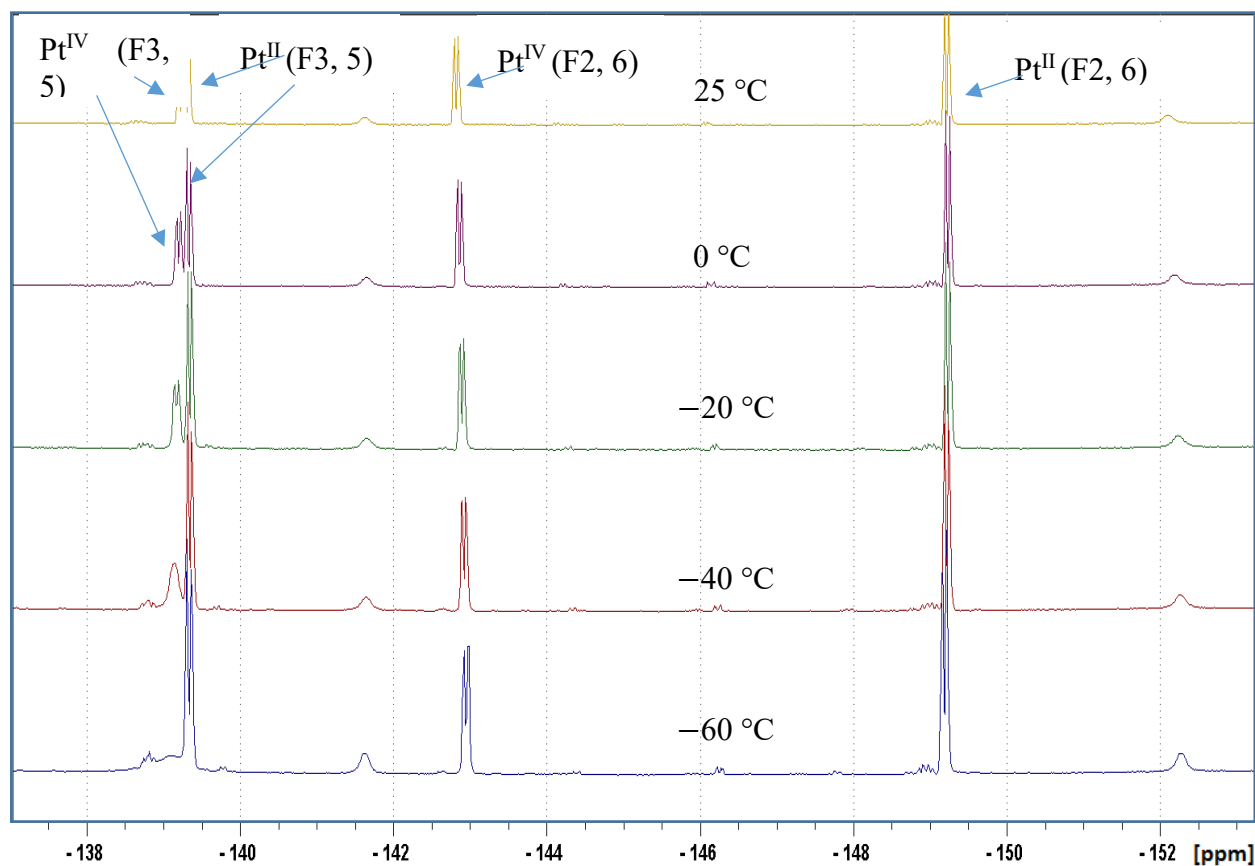

**Figure S3**  $^{19}\text{F}$  NMR spectra obtained for  $2 \cdot \text{H}_2\text{O}_{(\text{red})}$  over the temperature range of 25 °C to -60 °C.

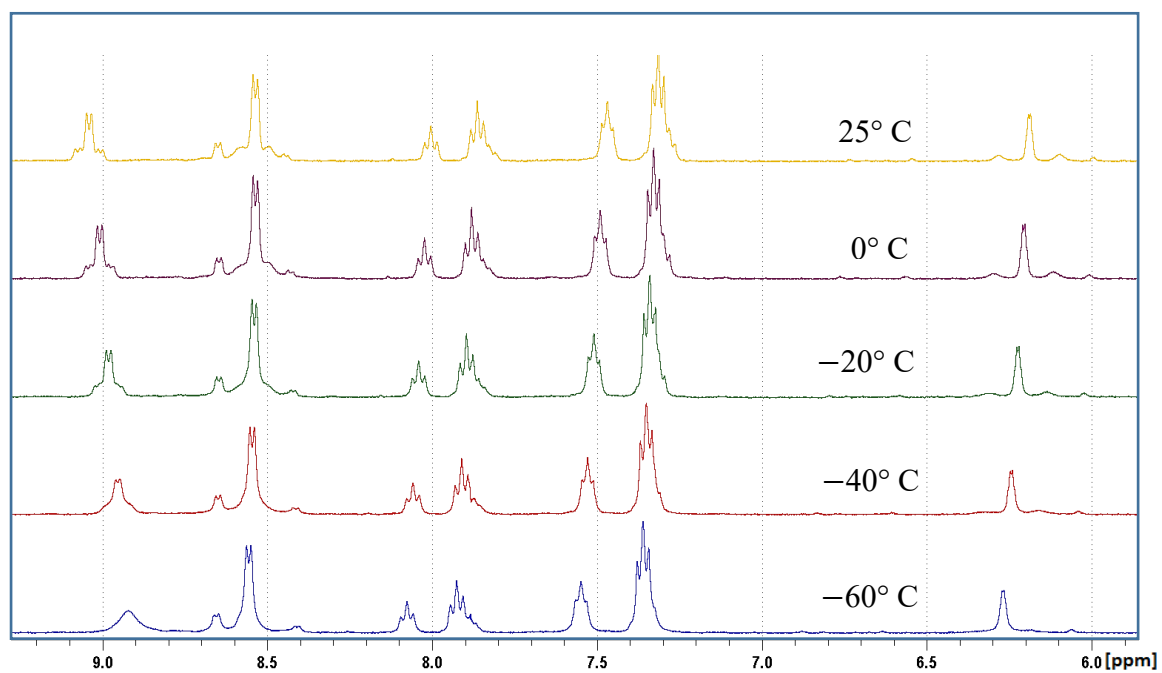

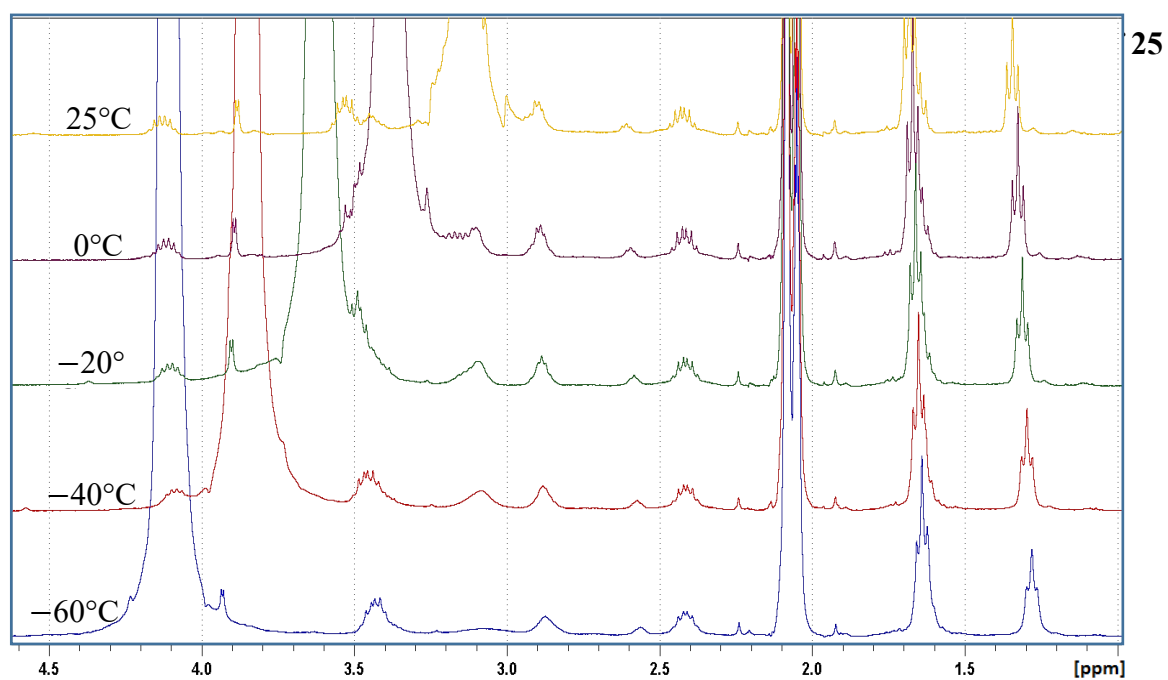

**Figure S5  $^1\text{H}$  NMR spectra obtained for  $2\cdot\text{H}_2\text{O}_{(\text{red})}$  over the temperature range of  $25\text{ }^\circ\text{C}$  to  $-60\text{ }^\circ\text{C}$ , showing 1 - 4.5 ppm region.**

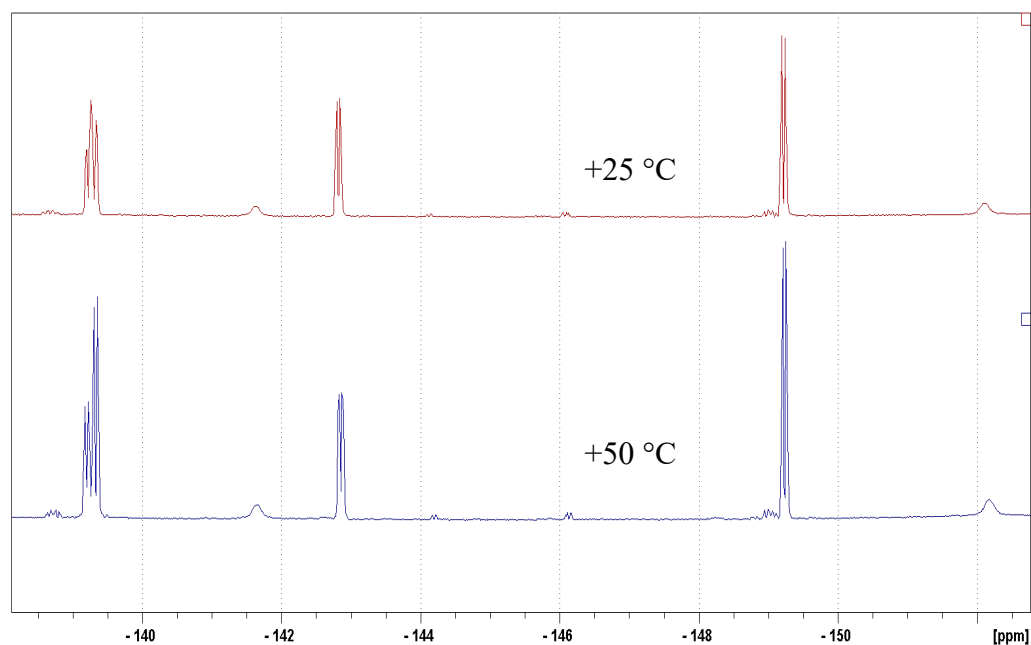

**Figure S6  $^{19}\text{F}$  NMR spectra obtained for  $2\cdot\text{H}_2\text{O}_{(\text{red})}$  at  $25^\circ\text{C}$  and  $50^\circ\text{C}$ .**

#### S4. PXRD data

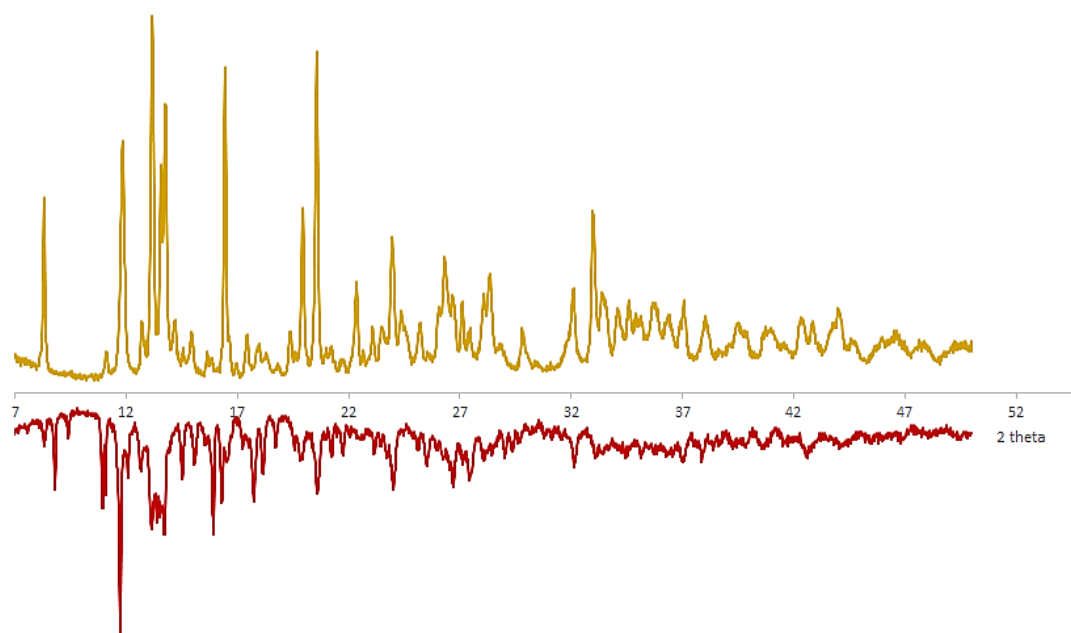

**Figure S7 Normalized powder X-ray diffraction data for bulk samples of  $2\cdot\text{H}_2\text{O}_{(\text{red})}$  and  $2\cdot\text{H}_2\text{O}_{(\text{gold})}$ , shown in the respective colors.**

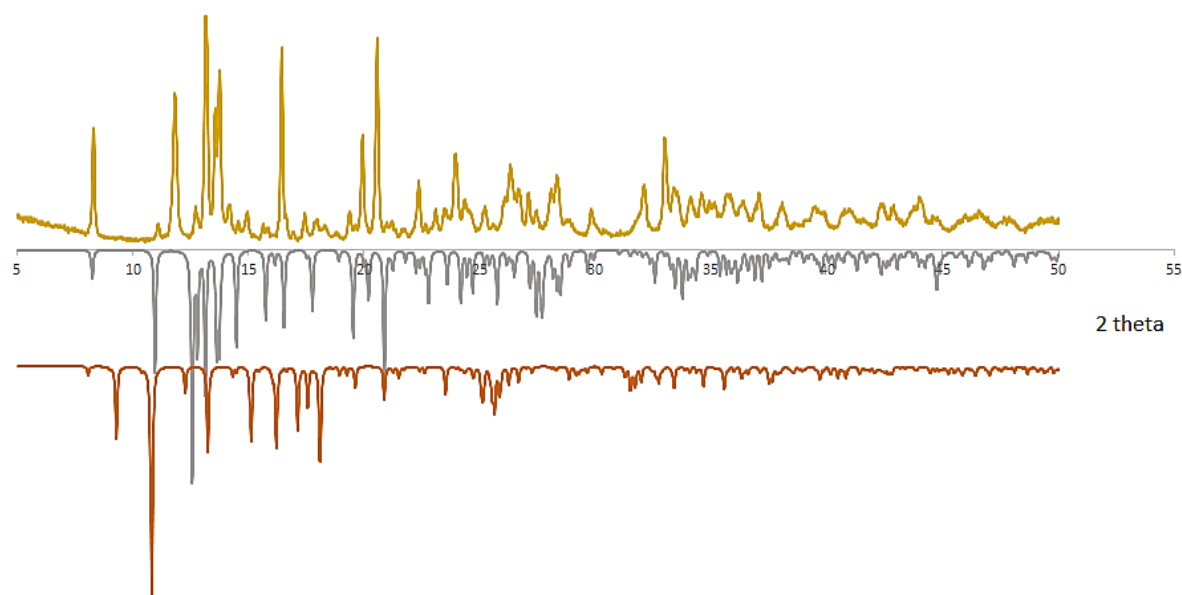

**Figure S8 Normalized powder X-ray diffraction data for bulk sample of  $2\cdot\text{H}_2\text{O}_{(\text{red})}$  (in red), with normalized powder X-ray diffraction data generated from the single crystals of 1H (in grey) and  $2\cdot\text{H}_2\text{O}_{(\text{red})}$  (in orange).**

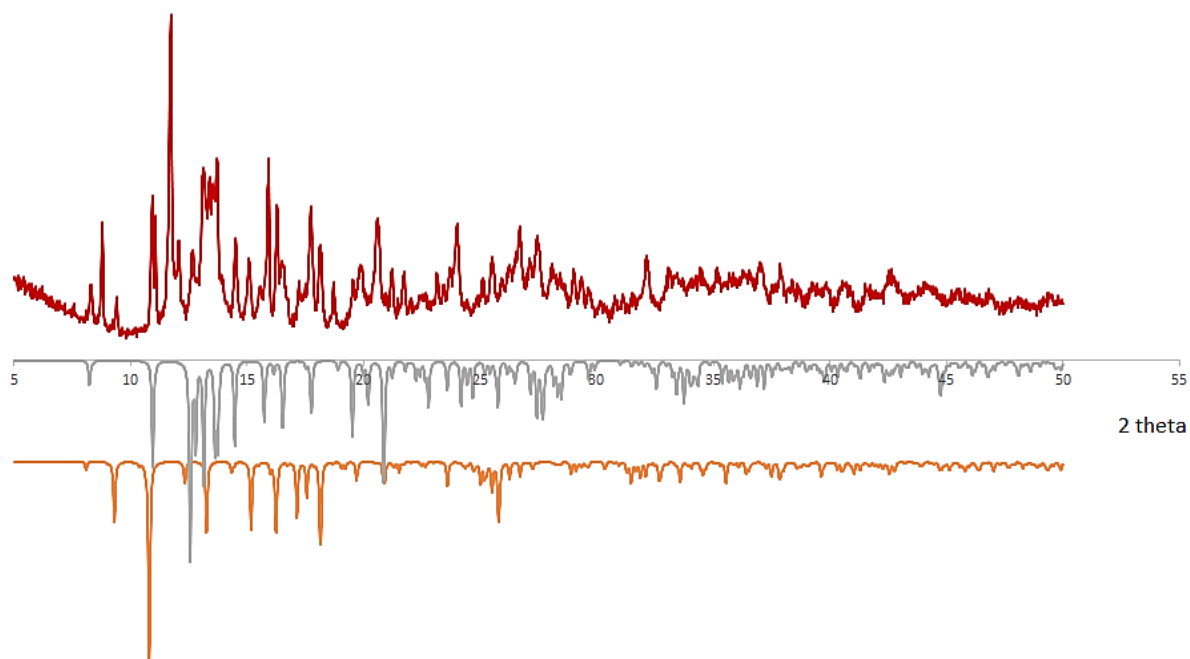

**Figure S9** Normalized powder X-ray diffraction data for bulk sample of  $2\cdot\text{H}_2\text{O}_{(\text{gold})}$  (in gold), with normalized powder X-ray diffraction data generated from the single crystals of **1H** (in grey) and  $2\cdot\text{H}_2\text{O}_{(\text{gold})}$  (in orange).

**S5. Isolation of PtIV from the solution of an aged bulk sample**  
**Table S5** Unit cell parameters for **1H** and co-crystallized **1(H/Cl)** collected from the bulk sample of  $2\cdot\text{H}_2\text{O}_{(\text{red})}$  and  $2\cdot\text{H}_2\text{O}_{(\text{gold})}$ .

|                       | $2\cdot\text{H}_2\text{O}_{(\text{red})}'$ | Co-crystallized<br><b>1(H/Cl)</b> | $[\text{NBu}_4][\text{PtCl}_3(\text{py})]$ |
|-----------------------|--------------------------------------------|-----------------------------------|--------------------------------------------|
| $a$ (Å)               | 19.6389(16)                                | 8.5696(7)                         | 14.3299(8)                                 |
| $b$ (Å)               | 13.3360(11)                                | 21.8047(21)                       | 14.3299(8)                                 |
| $c$ (Å)               | 16.9327(13)                                | 10.4957(10)                       | 12.0653(10)                                |
| $\alpha$ (°)          | 90                                         | 90                                | 90                                         |
| $\beta$ (°)           | 104.857(2)                                 | 92.456(8)                         | 90                                         |
| $\gamma$ (°)          | 90                                         | 90                                | 90                                         |
| vol (Å <sup>3</sup> ) | 4286.5(6)                                  | 1959.4(3)                         | 2477.6(3)                                  |

**Table S6** Unit cell parameters for Pt<sup>IV</sup> **2**·H<sub>2</sub>O<sub>(red)</sub>, co-crystallized **1**(H/Cl) and [NBu<sub>4</sub>][PtCl<sub>3</sub>(py)] isolated from the solution of an aged sample of **3**·0.5CH<sub>2</sub>Cl<sub>2</sub>.

|                      | <b>1H from</b><br><b>2·H<sub>2</sub>O<sub>(red)</sub></b> | <b>1H[S5]</b> | <b>co-crystallised 1(H/Cl)</b><br><b>from 2·H<sub>2</sub>O<sub>(gold)</sub></b> | <b>1(H/Cl)[S5]</b> |
|----------------------|-----------------------------------------------------------|---------------|---------------------------------------------------------------------------------|--------------------|
| <i>a</i> (Å)         | 8.5673(6)                                                 | 8.5390 (17)   | 8.5852(7)                                                                       | 8.5861 (3)         |
| <i>b</i> (Å)         | 10.6126(8)                                                | 10.613 (2)    | 21.8326(21)                                                                     | 21.9443 (9)        |
| <i>c</i> (Å)         | 10.8595(15)                                               | 10.846 (2)    | 10.4934(10)                                                                     | 10.5178 (4)        |
| <i>α</i> (°)         | 82.054(9)°                                                | 82.03 (3)     | 90°                                                                             | 90°                |
| <i>β</i> (°)         | 85.527(8)°                                                | 85.47 (3)     | 92.431(8)°                                                                      | 91.856 (2)         |
| <i>γ</i> (°)         | 87.451(6) °                                               | 87.28 (3)     | 90°                                                                             | 90°                |
| vol(Å <sup>3</sup> ) | 974.3(2)                                                  | 969.7 (3)     | 1965.7(3)                                                                       | 1980.6813)         |

### S6. Electrospray MS measurements

Similar to what was observed for *trans*-organoenamineamidoplatinum(II) complexes [S5], the starting material **1** was observed in the low-resolution mass spectra. However, in the accurate mass spectrum, only the (**1H** + H)<sup>+</sup> ion was obtained. For **2**·H<sub>2</sub>O<sub>(gold)</sub> or **2**·H<sub>2</sub>O<sub>(red)</sub>, no Pt<sup>IV</sup> complex was detected in the low-resolution positive electron spray mass spectrum, and in the accurate mass spectrum, (**1H** + H)<sup>+</sup> was obtained. These results confirm the reductive dehydration of Pt<sup>IV</sup> complexes into **1H**.

**1H**: ESI *m/z* (+ve): 652.2 (20% (**1**+H)<sup>+</sup>); acc. Mass MS/ESI calc. for ((**1H**) + H)<sup>+</sup> i.e., (C<sub>17</sub>H<sub>17</sub>BrClF<sub>4</sub>N<sub>3</sub>Pt + H<sup>+</sup>): 649.9902, found : 649.9930. All these data agree with the reported **1H** [S5].

**2**·H<sub>2</sub>O<sub>(gold)</sub>: ESI *m/z* (+ve): 652.2 (100% (**1**+H)<sup>+</sup>); acc. Mass MS/ESI calc. for ((**1H**)+H)<sup>+</sup> i.e., (C<sub>17</sub>H<sub>17</sub>BrClF<sub>4</sub>N<sub>3</sub>Pt + H<sup>+</sup>): 649.9902, found : 649.9930.

**2**·H<sub>2</sub>O<sub>(red)</sub>: ESI *m/z* (+ve): 652.2 (100% (**1**+H)<sup>+</sup>); acc. Mass MS/ESI calc. for ((**1H**)+H)<sup>+</sup> i.e., (C<sub>17</sub>H<sub>17</sub>BrClF<sub>4</sub>N<sub>3</sub>Pt + H<sup>+</sup>): 649.9902, found : 649.9930.

### S7. IR Spectroscopy data

**1H**: 3058w, 2962w, 2926w, 2868w, 2165w, 2080w, 1660s, 1619s, 1468s, 1451w, 1372m, 1355m, 1286w, 1263w, 1224m, 1190s, 1160w, 1111m, 1142s, 1087w, 1026m, 998m, 972s, 956m, 846w, 818s, 762s, 741s, 694s, 639w, 607s cm<sup>-1</sup>. All these data agree with the reported **1H** [S5].

## References

- S1. Kukushkin, V. Y.; Belskii, V.; Aleksandrova, E.; Pankova, E.; Kononov, V.; Yakovlev, V.; Moiseev, A., *ZHURNAL OBSHCHEI KHIMII* **1991**, *61*, 318-328.
- S2. Melanson, R.; Rochon, F. D., The crystal structure of potassium trichloro(2,6-lutidine)platinum(II). *Can. J. Chem.* **1976**, *54*, 1002-1006.
- S3. Cingi Biagini, M.; Ferrari, M.; Lanfranchi, M.; Marchiò, L.; Angela Pellinghelli, M., Chirality in mononuclear square planar complexes. *J. Chem. Soc., Dalton Trans.* **1999**, 1575-1580.
- S4. Flack, H. D., *Acta Cryst.* **1983**, *A39*, 876-881.
- S5. Ojha, R.; Mason, D.; Forsyth, C. M.; Deacon, G. B.; Junk, P. C.; Bond, A. M., *J. Inorg. Biochem.* **2021**, *218*, 111360.
